# Supplementary material
Source: PubMed Central journal article supplement (PMC3208652)
Supplement: supp_184_7_836__1.pdf [file supp_184_7_836__1.pdf]

## Online Data Supplement

### Ozone and Survival in Four Cohorts with Potentially Predisposing Diseases

Antonella Zanobetti and Joel Schwartz

#### MATERIALS AND METHODS

##### *Study population*

The US Medicare program covers hospitalization for all residents aged 65 and older. Using data for the years 1985 to 2006, we constructed four cohorts of persons with potentially predisposing conditions. These were defined as persons discharged alive after emergency admission for the specific conditions we hypothesized might render subjects at greater risk, defining cases as a primary discharge diagnosis of chronic obstructive pulmonary disease (COPD, International Classification of Disease 9<sup>th</sup> revision (ICD-9): 490-496, except 493), diabetes (ICD-9: 250), congestive heart failure (CHF, ICD-9: 428), and myocardial infarction (MI, ICD-9: 410).

We obtained date of death for each subject, or whether they were still alive as of the end of 2006, and information on age, gender, race, severity of the index admission expressed by the number of coronary and medical intensive care days, and on medical conditions that might affect the risk of survival. We defined these as previous admissions with diagnoses of atrial fibrillation (ICD-9: 427.3) or MI, and secondary (on the index admission) or previous diagnoses for COPD, diabetes, CHF, and essential hypertension (ICD-9: 401).

Subjects alive the first of May of the year following the index admission entered into the cohort, and follow-up periods were calendar years. We excluded subjects whose death or subsequent admission occurred within the first three months of their index admission, and those who were admitted in 2006.

### *Environmental data*

We obtained ozone (8-hour mean) data from US Environmental Protection Agency's Air Quality System Technology Transfer Network in 105 cities (<http://www.epa.gov/ttn/airs/airsaqs/detaildata/downloadaqdata.htm>). For each subject and follow-up period we created yearly averages of the 8-hour mean daily ozone concentrations for the summer (May-September) and transitional season (Spring and Autumn) for that year. Ozone was then treated as a time varying covariate in the survival analysis.

Similarly, Jerrett et al (1) used the daily maximum ozone concentrations during April to September only.

We choose 105 cities with at least 100k inhabitants, monitoring data for ozone, and representing a geographic distribution across the US. The cities and the ozone distributions are in Table 1S in the online supplement. In each city the data was retrieved on a county level; when more than one monitor was available in one county, we computed local daily mean ozone concentrations using an algorithm that accounts for the different monitor-specific means and variances (2,3).

### *Meteorological data*

We obtained temperature data from the National Oceanic and Atmospheric Administration (NOAA) (<http://www.ncdc.noaa.gov/oa/ncdc.html>), and created the yearly average of summertime (June-August) and wintertime (December- February) temperature in each year in each city.

We examined if the risk differed by prevailing climate by dividing the US into regions based on the Köppen climate classification (4) (<http://koeppen-geiger.vu-wien.ac.at/>), which is one of the most widely used climate classification systems. We used the following classification: region 1: humid subtropical climates and maritime temperate climates, which includes FL, LA TX, GA, AL, MS, AR, OK, KS, MO, TN, SC, NC, VA, WV, KY; region 2: warm summer

continental climates , including ND, MN, WI, MI, PA, NY, CT, RI, MA, VT, NH, ME; region 3: hot summer continental climates with SD, NE, IA, IL, IN, OH; region 4: dry climates (NM, AZ, NV); region 5: dry climates together with continental climate with MT, ID, WY, UT, CO; region 6: Mediterranean climates which includes CA, OR, WA .

### *Statistical methods*

To avoid cross-sectional confounding we fit separate survival analyses in each city. The exposure was warm season (or transitional season) ozone, which was treated as a time varying covariate. To do this, we used the counting process extension of the Proportionate Hazard model pioneered by Andersen and Gill (5). In this formulation, multiple observations are created for each person, where each observation represents a single person-year of mortality follow-up. We analyzed the data with an extended Cox's proportional hazard regression model, which takes the following form:

$$h_i(t) = \lambda_0(t) e^{\beta_1 x_{i1} + \dots + \beta_k x_{ik} + \delta_1 z_{i1}(t) + \dots + \delta_j z_{ij}(t)}$$

Where:  $h_i(t)$  is the hazard for individual  $i$  at time  $t$  (year),  $\lambda_0(t)$  is the baseline hazard function,  $\beta_1 x_{i1} + \dots + \beta_k x_{ik}$  is a linear function of a set of  $k$  fixed time-invariant covariates such as gender,  $\delta_1 x_{i1} + \dots + \delta_j x_{ij}$  is a linear function of time-varying covariates such as air pollution.

We analyzed the data using Proc PHREG in SAS (6). To control for tied observations we used the appropriate likelihood function as given by Kalbfleisch and Prentice (7).

City-specific cohorts were created for each of the four conditions that we wanted to analyze. Separate survival analyses, with failure defined as death, were conducted for each city and each cohort. A subject entered the cohort if he/she survived at least 3 months and was alive on the first January of the year following the index admission. For each subject the follow up periods were 1 year periods (January – December) until the year in which they die or until December 2006 (censoring). This method has been previously described (8, 9).

The focus of our analysis was whether year- to-year variations in ozone concentrations within each city were associated with year-to-year variations in survival. To avoid confounding by long-term time trends, we controlled for such a trend with a linear term for year of follow up. Hence we were examining whether year-to-year variations in survival *around its long-term trend* were associated with year-to-year variations in ozone, *around its long-term trend*. We also included in the model indicator variables for season of index admission, defined as: cold (December through February), hot (June through August), and transitional. To control for weather we included in the model the yearly averages of summertime and wintertime temperature.

We also controlled for individual risk factors such as age, gender, race, number of days of coronary and medical intensive care, previous diagnoses for atrial fibrillation and MI, and secondary or previous diagnoses for COPD, diabetes, CHF, and hypertension. To allow for possible non-proportionality of the survival rates, age (5 year categories), gender, and race (white, black, others) were treated as stratification variables.

In the second stage of the analysis, the results of these city specific analyses (for each predisposing condition) were combined using a random effect meta-analysis (10).

The pooled analysis was done separately for the two choices of exposure index: the average ozone during summer and the average during the transitional period.

We used a meta-regression between the city specific effect estimates for ozone and city average temperature and temperature squared, and we found an inverted U-shaped relationship. Temperature is a proxy measure for ventilation and therefore also of air conditioning use and may play a role in explaining differences among regions.

We then added dummy variables for region to the meta-regression and we obtained the estimated deviation from the overall effect of ozone in each region, as predicted by temperature. In this way we could determine whether there was any remaining regional variation in ozone effect not explained by temperature.

The results are expressed as Hazard ratio (HR) for a 5 ppb increment of ozone.

## References

1. Jerrett M, Burnett RT, Pope CA, 3rd, Ito K, Thurston G, Krewski D, Shi Y, Calle E, Thun M. Long-term ozone exposure and mortality. *N Engl J Med* 2009;360:1085-1095.
2. Schwartz J. 2000. Assessing confounding, effect modification, and thresholds in the association between ambient particles and daily deaths. *Environmental health perspectives* 108(6):563-568.
3. Zanobetti A, Schwartz J, Dockery DW. 2000. Airborne particles are a risk factor for hospital admissions for heart and lung disease. *Environmental health perspectives* 108(11):1071-1077.
4. Kottek M, Grieser J, Beck C, Rudolf B, Rubel F. World map of the Köppen-Geiger climate classification updated. *Meteorol Z* 2006:259-263.
5. Andersen P, Gill R. Cox's regression model counting process: A large sample study. *Annals of Statistics* 1982;10:1100 - 1120.
6. SAS. Sas software release 9.1. 9.1 ed. Cary NC: SAS Institute; 2006.
7. Kalbfleisch JD, Prentice RL. *The statistical analysis of failure time data*. New York; 1980.
8. Zanobetti A, Schwartz J. Particulate air pollution, progression, and survival after myocardial infarction. *Environmental health perspectives* 2007;115:769-775.
9. Zanobetti A, Bind MA, Schwartz J. Particulate air pollution and survival in a copd cohort. *Environ Health* 2008;7:48.
10. Berkey CS, Hoaglin DC, Antczak-Bouckoms A, Mosteller F, Colditz GA. Meta-analysis of multiple outcomes by regression with random effects. *Statistics in Medicine* 1998;17:2537-2550.

**Table E1: Total population, population 65 and older and average ozone during warm (May-September) and transitional season (Spring + Autumn) in the 105 cities included in the study during the years 1985-2006**

| City             | State | Total Pop | Pop 65 + | Regions | Ozone average May-September |      |      | Ozone average Spring+Autumn |      |      |
|------------------|-------|-----------|----------|---------|-----------------------------|------|------|-----------------------------|------|------|
|                  |       |           |          |         | mean                        | 5%   | 95%  | mean                        | 5%   | 95%  |
| Albuquerque      | NM    | 557       | 65       | 4       | 52.2                        | 43.1 | 60.6 | 42.9                        | 35.6 | 47.9 |
| Allentown        | PA    | 579       | 92       | 2       | 47.7                        | 43.0 | 53.6 | 36.5                        | 29.8 | 41.7 |
| Anaheim          | CA    | 2846      | 284      | 6       | 49.7                        | 44.3 | 55.1 | 43.6                        | 38.4 | 48.9 |
| Ann Arbor        | MI    | 323       | 27       | 2       | 45.9                        | 41.4 | 50.6 | 40.1                        | 35.7 | 46.1 |
| Atlanta          | GA    | 2915      | 217      | 1       | 55.2                        | 48.2 | 64.8 | 43.3                        | 37.3 | 52.2 |
| Austin           | TX    | 812       | 56       | 1       | 45.3                        | 38.9 | 49.0 | 42.8                        | 37.2 | 46.3 |
| Bakersfield      | CA    | 662       | 63       | 6       | 71.4                        | 66.7 | 76.4 | 55.1                        | 50.2 | 62.4 |
| Baltimore        | MD    | 1405      | 199      | 1       | 51.1                        | 41.1 | 57.6 | 35.4                        | 29.9 | 41.9 |
| Baton Rouge      | LA    | 434       | 44       | 1       | 47.2                        | 43.7 | 52.7 | 43.1                        | 37.9 | 48.2 |
| Birmingham       | AL    | 805       | 105      | 1       | 49.5                        | 43.3 | 56.6 | 41.1                        | 36.1 | 49.2 |
| Boston           | MA    | 3529      | 464      | 2       | 41.8                        | 37.7 | 46.9 | 34.6                        | 30.9 | 38.2 |
| Boulder          | CO    | 291       | 23       | 5       | 51.3                        | 45.1 | 58.5 | 38.0                        | 29.4 | 45.1 |
| Broward          | FL    | 1623      | 256      | 1       | 28.4                        | 22.9 | 32.6 | 35.8                        | 31.3 | 39.8 |
| Buffalo          | NY    | 1170      | 188      | 2       | 47.1                        | 40.4 | 55.1 | 36.0                        | 32.3 | 40.5 |
| Canton/Akron     | OH    | 921       | 136      | 3       | 51.5                        | 46.0 | 59.0 | 40.3                        | 37.6 | 44.9 |
| Cedar Rapids     | IA    | 192       | 24       | 3       | 40.1                        | 31.9 | 47.2 | 34.2                        | 25.8 | 40.9 |
| Charleston       | SC    | 310       | 37       | 1       | 43.1                        | 37.9 | 48.7 | 41.1                        | 35.2 | 48.4 |
| Charlotte        | NC    | 695       | 61       | 1       | 55.6                        | 49.3 | 62.4 | 46.1                        | 41.9 | 50.0 |
| Chicago          | IL    | 6925      | 788      | 3       | 40.8                        | 35.8 | 45.9 | 29.6                        | 26.1 | 34.6 |
| Cincinnati       | OH    | 845       | 116      | 3       | 49.9                        | 43.2 | 55.9 | 38.4                        | 34.6 | 43.0 |
| Cleveland        | OH    | 1621      | 252      | 3       | 46.4                        | 39.6 | 51.5 | 35.9                        | 31.1 | 38.1 |
| Colorado Springs | CO    | 517       | 46       | 5       | 48.3                        | 39.6 | 55.8 | 38.9                        | 31.9 | 43.8 |
| Columbia         | SC    | 537       | 55       | 1       | 49.9                        | 43.8 | 57.7 | 43.7                        | 39.7 | 47.0 |
| Columbus         | OH    | 1069      | 107      | 3       | 50.4                        | 43.8 | 58.4 | 38.6                        | 34.5 | 42.3 |
| Dallas           | TX    | 2219      | 183      | 1       | 49.6                        | 41.4 | 56.9 | 40.2                        | 34.1 | 46.8 |
| Davenport        | IL    | 308       | 42       | 3       | 48.1                        | 40.4 | 53.6 | 40.2                        | 35.1 | 44.1 |
| Dayton           | OH    | 559       | 78       | 3       | 50.0                        | 42.1 | 58.1 | 39.5                        | 33.0 | 46.0 |
| Denver           | CO    | 1446      | 145      | 5       | 49.1                        | 44.2 | 54.1 | 35.5                        | 32.4 | 39.0 |
| Des Moines       | IA    | 375       | 42       | 3       | 35.1                        | 21.5 | 46.2 | 29.6                        | 15.3 | 38.1 |
| Detroit          | MI    | 4043      | 500      | 2       | 43.3                        | 38.2 | 49.6 | 36.1                        | 30.3 | 40.5 |
| Durham           | NC    | 223       | 22       | 1       | 53.3                        | 46.6 | 59.7 | 45.1                        | 41.6 | 48.8 |
| El paso          | TX    | 680       | 68       | 1       | 50.0                        | 41.5 | 54.5 | 41.7                        | 34.9 | 44.8 |
| Erie             | PA    | 281       | 41       | 2       | 49.1                        | 44.8 | 56.9 | 38.6                        | 33.7 | 44.9 |
| Eugene           | OR    | 323       | 43       | 6       | 36.1                        | 32.8 | 40.9 | 34.6                        | 30.5 | 39.7 |
| Fresno           | CA    | 799       | 80       | 6       | 69.0                        | 62.1 | 75.6 | 52.7                        | 45.9 | 59.9 |
| Ft. Worth        | TX    | 1446      | 124      | 1       | 54.2                        | 47.1 | 59.0 | 44.1                        | 40.9 | 47.2 |
| Gary             | IN    | 485       | 0        | 3       | 47.1                        | 39.9 | 53.8 | 40.4                        | 35.4 | 49.4 |

|               |    |      |     |   |      |      |      |      |      |      |
|---------------|----|------|-----|---|------|------|------|------|------|------|
| Grand Rapids  | MI | 574  | 61  | 2 | 44.8 | 40.2 | 49.6 | 40.0 | 37.1 | 45.3 |
| Greensborough | NC | 421  | 50  | 1 | 54.5 | 43.6 | 62.2 | 48.0 | 39.8 | 52.8 |
| Harrisburg    | PA | 252  | 36  | 2 | 49.3 | 43.1 | 54.6 | 37.5 | 33.0 | 42.9 |
| Hartford      | CT | 857  | 126 | 2 | 44.7 | 39.9 | 48.4 | 36.0 | 29.8 | 42.1 |
| Holland       | MI | 344  | 36  | 2 | 48.5 | 44.2 | 53.7 | 43.0 | 39.1 | 48.6 |
| Honolulu      | HI | 876  | 118 | 1 | 15.6 | 9.8  | 23.9 | 20.9 | 14.4 | 29.3 |
| Houston       | TX | 3401 | 258 | 1 | 44.2 | 39.3 | 51.2 | 40.9 | 35.4 | 49.4 |
| Indianapolis  | IN | 860  | 97  | 3 | 51.4 | 44.5 | 57.8 | 44.8 | 39.5 | 53.8 |
| Jacksonville  | FL | 920  | 97  | 1 | 43.3 | 37.9 | 48.3 | 43.8 | 39.9 | 48.6 |
| Jersy city    | NJ | 609  | 71  | 2 | 46.7 | 38.8 | 56.2 | 29.8 | 24.5 | 33.5 |
| Kansas City   | KS | 793  | 85  | 1 | 49.7 | 41.7 | 55.0 | 39.1 | 34.0 | 42.8 |
| Kansas City   | MO | 655  | 83  | 1 | 47.0 | 42.8 | 53.5 | 38.3 | 33.9 | 43.5 |
| Knoxville     | TN | 488  | 65  | 1 | 53.4 | 46.5 | 64.9 | 45.0 | 40.9 | 55.2 |
| Las Vegas     | NV | 1376 | 153 | 4 | 55.3 | 49.9 | 59.2 | 44.5 | 40.4 | 47.1 |
| Little Rock   | AR | 361  | 42  | 1 | 50.1 | 43.8 | 55.3 | 40.2 | 36.3 | 45.0 |
| Los Angeles   | CA | 9519 | 943 | 6 | 58.2 | 49.8 | 74.0 | 44.4 | 37.2 | 55.3 |
| Louisville    | KY | 694  | 95  | 1 | 49.5 | 41.0 | 58.0 | 38.2 | 28.7 | 46.6 |
| Medford       | OR | 181  | 29  | 6 | 45.5 | 40.7 | 48.6 | 42.4 | 37.8 | 47.5 |
| Memphis       | TN | 897  | 91  | 1 | 55.1 | 46.9 | 63.2 | 46.2 | 40.4 | 54.7 |
| Mercer        | PA | 120  | 22  | 2 | 50.7 | 45.6 | 59.1 | 39.9 | 33.2 | 45.7 |
| Miami         | FL | 2253 | 305 | 1 | 29.6 | 26.9 | 32.5 | 38.3 | 34.8 | 43.5 |
| Milwaukee     | WI | 1301 | 167 | 2 | 44.1 | 38.7 | 49.8 | 36.9 | 33.6 | 41.1 |
| Nashville     | TN | 570  | 64  | 1 | 46.5 | 34.7 | 57.9 | 35.4 | 25.7 | 42.5 |
| New Haven     | CT | 824  | 120 | 2 | 44.7 | 40.8 | 52.3 | 37.1 | 29.8 | 45.1 |
| New Orleans   | LA | 940  | 113 | 1 | 42.5 | 36.2 | 50.1 | 41.1 | 35.4 | 47.8 |
| Norfolk       | VA | 1354 | 136 | 1 | 52.2 | 46.1 | 59.0 | 43.6 | 40.4 | 47.5 |
| New York City | NY | 8008 | 953 | 2 | 39.8 | 34.7 | 45.5 | 26.1 | 23.0 | 28.5 |
| Oakland       | CA | 1444 | 149 | 6 | 32.3 | 28.3 | 38.4 | 30.7 | 27.4 | 34.9 |
| Oklahoma City | OK | 660  | 83  | 1 | 52.5 | 45.9 | 60.0 | 42.6 | 38.9 | 45.8 |
| Omaha         | NE | 586  | 60  | 3 | 37.0 | 31.8 | 43.6 | 31.7 | 24.5 | 40.6 |
| Orlando       | FL | 1262 | 131 | 1 | 42.0 | 37.0 | 45.5 | 44.0 | 41.1 | 49.7 |
| Palm beach    | FL | 1131 | 258 | 1 | 28.7 | 23.6 | 32.1 | 35.1 | 30.3 | 40.8 |
| Pensacola     | FL | 294  | 40  | 1 | 46.9 | 40.9 | 52.1 | 45.7 | 38.4 | 49.2 |
| Philadelphia  | NJ | 4603 | 642 | 2 | 50.7 | 45.6 | 58.9 | 34.9 | 30.7 | 37.5 |
| Phoenix       | AZ | 3072 | 364 | 4 | 56.2 | 50.6 | 60.0 | 48.8 | 44.5 | 52.0 |
| Pinellas      | FL | 921  | 206 | 1 | 38.2 | 32.7 | 43.0 | 41.4 | 38.1 | 45.4 |
| Pittsburg     | PA | 1282 | 230 | 2 | 48.9 | 37.1 | 56.2 | 34.8 | 27.7 | 39.9 |
| Port Arthur   | TX | 252  | 35  | 1 | 42.2 | 36.1 | 49.6 | 41.4 | 34.7 | 47.9 |
| Portland      | OR | 1789 | 186 | 6 | 34.0 | 30.8 | 37.0 | 31.5 | 27.7 | 36.1 |
| Providence    | RI | 789  | 117 | 2 | 44.8 | 41.8 | 50.0 | 38.9 | 33.7 | 44.9 |
| Provo/Orem    | UT | 369  | 24  | 5 | 54.7 | 51.2 | 58.0 | 49.1 | 47.0 | 52.1 |
| Raleigh       | NC | 628  | 48  | 1 | 53.8 | 46.0 | 65.1 | 46.4 | 39.5 | 55.1 |
| Reno          | NV | 339  | 37  | 4 | 49.8 | 43.4 | 53.5 | 39.8 | 36.6 | 41.7 |
| Richmond      | VA | 720  | 82  | 1 | 53.6 | 46.5 | 60.6 | 44.3 | 40.9 | 49.5 |
| Riverside     | CA | 1545 | 197 | 6 | 67.7 | 60.0 | 81.3 | 52.7 | 49.4 | 56.3 |
| Sacramento    | CA | 1223 | 137 | 6 | 55.0 | 50.6 | 58.0 | 43.3 | 39.6 | 48.7 |

|                |    |      |     |   |      |      |      |      |      |      |
|----------------|----|------|-----|---|------|------|------|------|------|------|
| Salt Lake City | UT | 898  | 74  | 5 | 54.6 | 49.0 | 57.8 | 47.7 | 37.6 | 51.9 |
| San Antonio    | TX | 1393 | 147 | 1 | 44.1 | 36.7 | 49.2 | 42.4 | 36.6 | 48.0 |
| San Diego      | CA | 2814 | 317 | 6 | 48.6 | 45.1 | 55.4 | 47.8 | 43.3 | 56.3 |
| San Francisco  | CA | 1484 | 197 | 6 | 26.6 | 21.2 | 30.9 | 27.5 | 22.5 | 31.5 |
| San Jose       | CA | 1683 | 163 | 6 | 38.7 | 35.3 | 42.4 | 34.2 | 30.7 | 36.8 |
| Scranton       | PA | 213  | 42  | 2 | 47.5 | 42.2 | 54.4 | 38.9 | 34.4 | 43.4 |
| Seattle        | WA | 3044 | 312 | 6 | 34.3 | 30.6 | 39.3 | 32.1 | 28.3 | 35.5 |
| Spokane        | WA | 418  | 53  | 6 | 45.4 | 40.4 | 50.9 | 42.7 | 37.2 | 48.7 |
| Springfield    | MA | 456  | 67  | 2 | 45.2 | 39.9 | 48.5 | 36.4 | 32.2 | 44.6 |
| Steubenville   | OH | 132  | 25  | 3 | 47.7 | 38.9 | 56.6 | 36.8 | 28.7 | 42.4 |
| St. Louis      | MO | 1563 | 213 | 1 | 48.8 | 43.6 | 55.0 | 37.6 | 33.1 | 44.2 |
| Tallahassee    | FL | 239  | 20  | 1 | 41.2 | 34.3 | 45.4 | 43.2 | 38.1 | 50.5 |
| Tampa          | FL | 999  | 121 | 1 | 41.0 | 34.9 | 45.6 | 43.9 | 39.4 | 48.7 |
| Terra Haute    | IN | 106  | 15  | 3 | 48.9 | 41.7 | 58.2 | 42.7 | 34.5 | 50.6 |
| Toledo         | OH | 455  | 61  | 3 | 45.6 | 41.0 | 49.3 | 35.9 | 31.4 | 40.2 |
| Tucson         | AZ | 844  | 121 | 4 | 50.5 | 46.7 | 53.0 | 45.6 | 43.1 | 47.7 |
| Tulsa          | OK | 563  | 68  | 1 | 52.8 | 46.3 | 58.0 | 42.7 | 39.1 | 46.2 |
| Washington     | DC | 762  | 88  | 1 | 49.8 | 43.4 | 56.9 | 32.3 | 27.0 | 36.9 |
| Wilmington     | DE | 500  | 59  | 1 | 49.7 | 41.8 | 55.2 | 35.1 | 28.9 | 38.8 |
| Winston        | NC | 306  | 40  | 1 | 52.8 | 46.9 | 59.4 | 45.6 | 41.8 | 49.3 |
| Worcester      | MA | 751  | 99  | 2 | 45.3 | 40.3 | 50.2 | 39.7 | 32.5 | 45.8 |
| Youngstown     | OH | 483  | 82  | 3 | 49.7 | 40.4 | 56.2 | 39.6 | 33.2 | 43.4 |
